# Supplementary material for: Whole transcriptome profiling of patient-derived xenograft models as a tool to identify both tumor and stromal specific biomarkers
Source: PubMed Central journal article supplement (PMC4991491; doi:10.18632/oncotarget.8014), 2016-03-09
Supplement: oncotarget-07-20773-s001.pdf [file oncotarget-07-20773-s001.pdf]

## Whole transcriptome profiling of patient-derived xenograft models as a tool to identify both tumor and stromal specific biomarkers

### Supplementary Materials

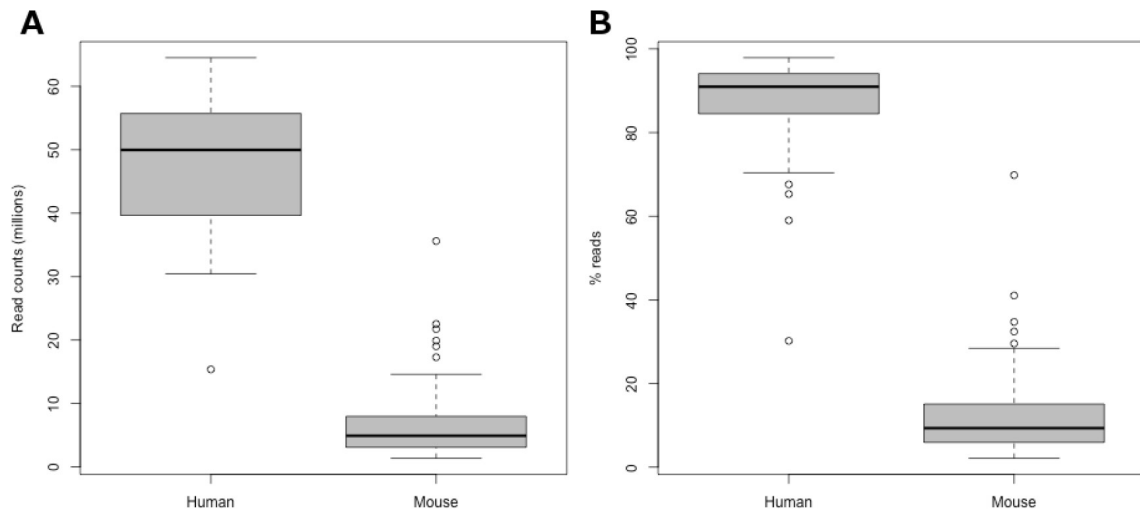

**Supplementary Figure S1: Read mapping statistics.** Boxplots showing (A) number and (B) percentage of reads mapping to human and mouse across the 79 PDX models.

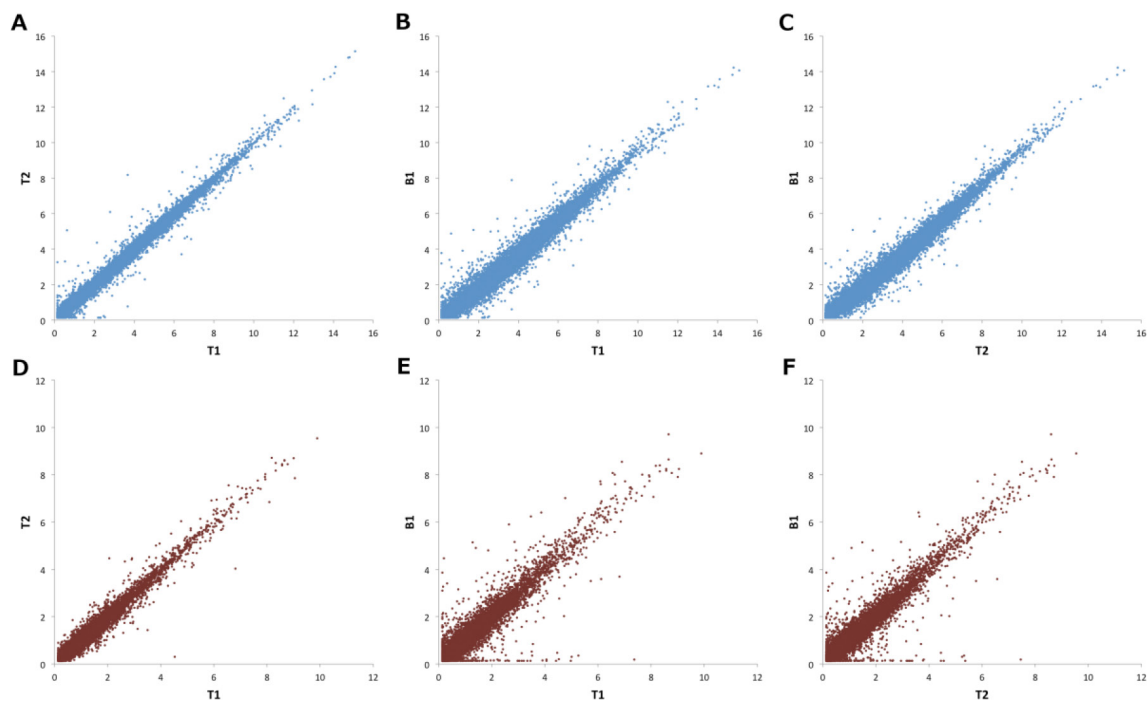

**Supplementary Figure S2: Replicate comparison.** Scatterplots showing expression correspondence between two technical and one biological replicate across human (represented by blue markers) and mouse (red) genes. (A) Technical replicate 2 (T2) versus 1 (T1) (human;  $r = 0.99$ ), (B) biological replicate 1 (B1) versus T1 (human;  $r = 0.99$ ), (C) B1 versus T2 (human;  $r = 0.99$ ), (D) T2 versus T1 (mouse;  $r = 0.99$ ), (E) B1 versus T1 (mouse;  $r = 0.96$ ), (F) B1 versus T2 (mouse;  $r = 0.96$ ).

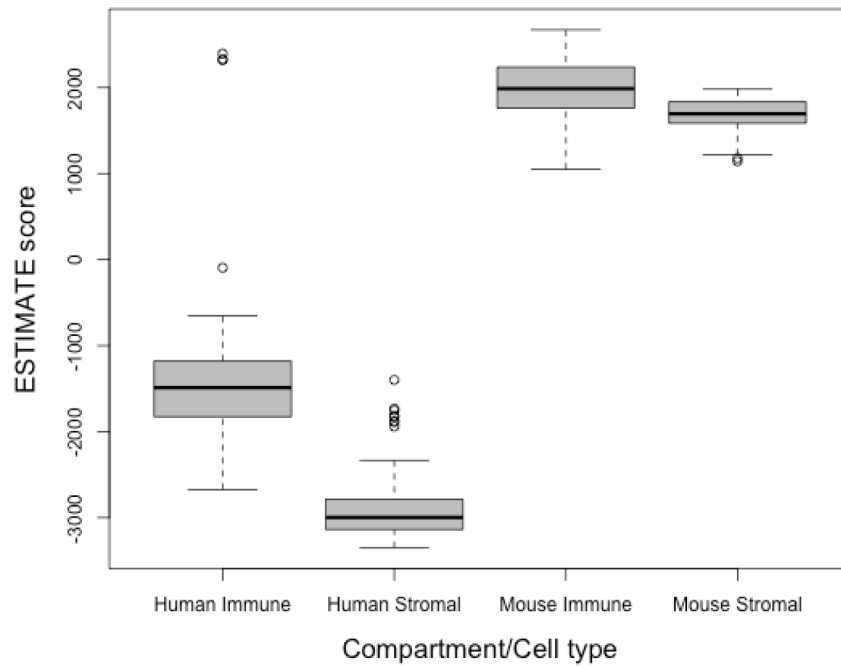

**Supplementary Figure S3: Comparison of ESTIMATE [10] stromal and immune cell content in the human and mouse components.**

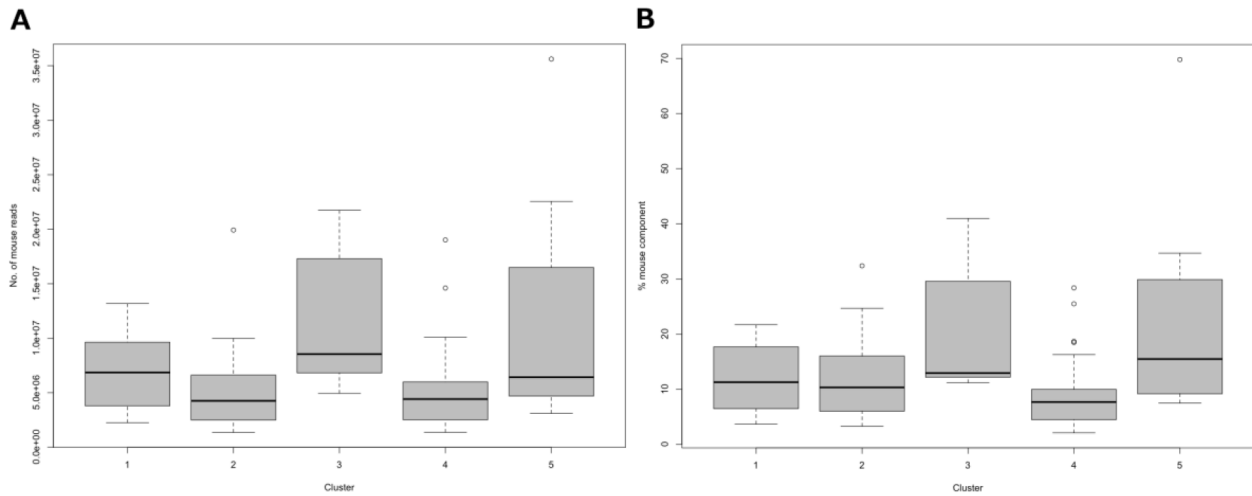

**Supplementary Figure S4: Assessment of read coverage across mouse clusters.** Comparison of (A) number of mapped mouse reads, and (B) percentage mouse component between mouse clusters.

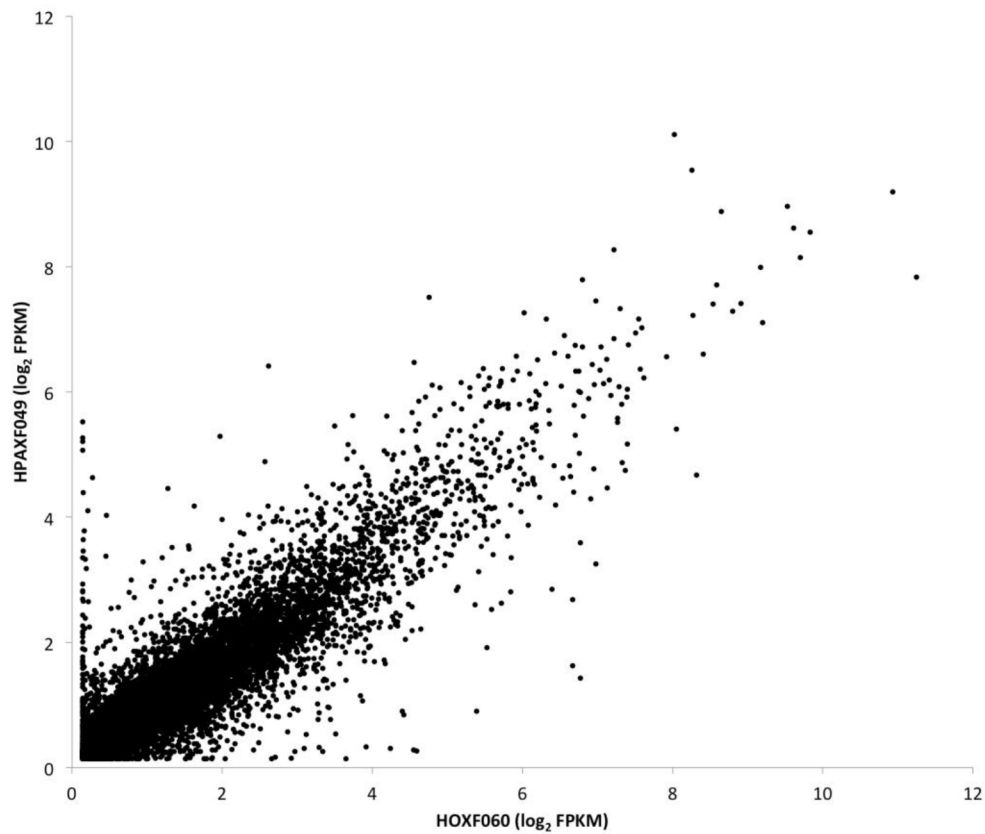

**Supplementary Figure S5: Comparison of mouse gene expression between high and low coverage samples.** Mouse gene expression correlation ( $r = 0.93$ ) between HOXF060 (high percentage mouse component: 69.8%, high coverage: 35,614,081 reads mapped to mouse genome) and HPAXF049 (low percentage mouse component: 7.5%, low coverage: 3,109,853 reads).

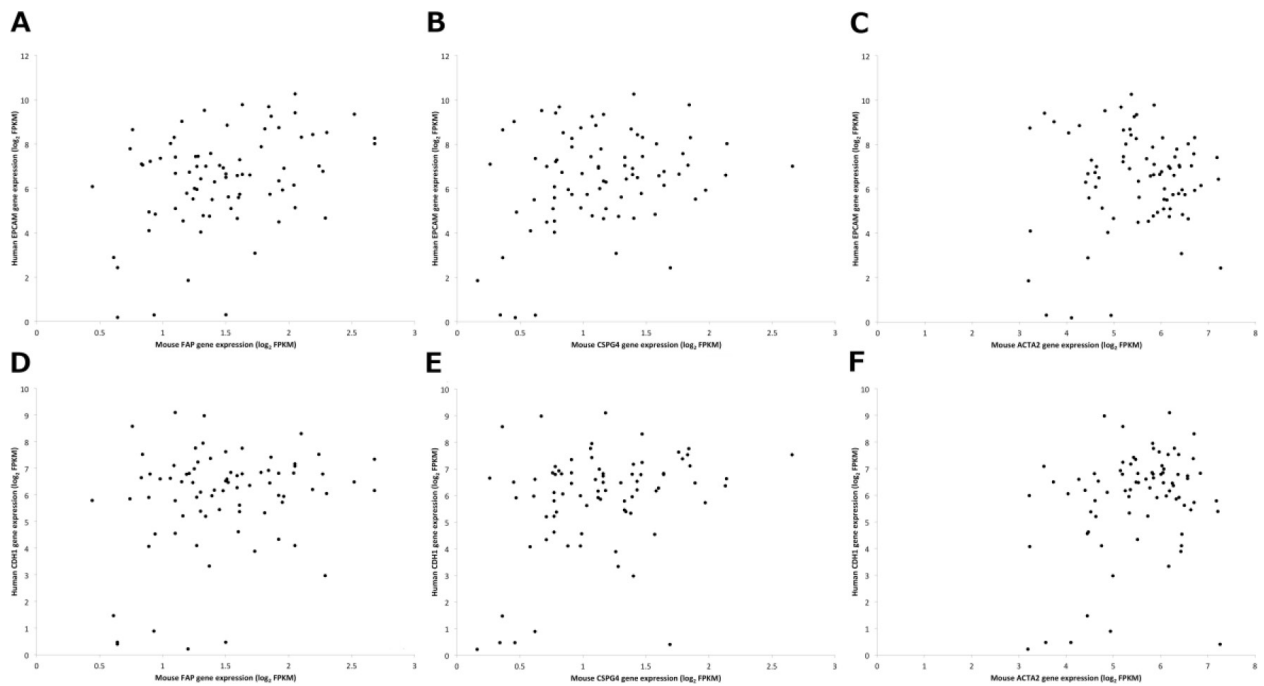

**Supplementary Figure S6: Comparison of human epithelial and mouse cancer activated fibroblast markers.** (A) *EPCAM* versus *Fap* ( $r = 0.37$ ). (B) *EPCAM* versus *Cspg4* ( $r = 0.27$ ). (C) *EPCAM* versus *Acta2* ( $r = 0.06$ ). (D) *CDH1* versus *Fap* ( $r = 0.24$ ). (E) *CDH1* versus *Cspg4* ( $r = 0.32$ ). (F) *CDH1* versus *Acta2* ( $r = 0.29$ ).

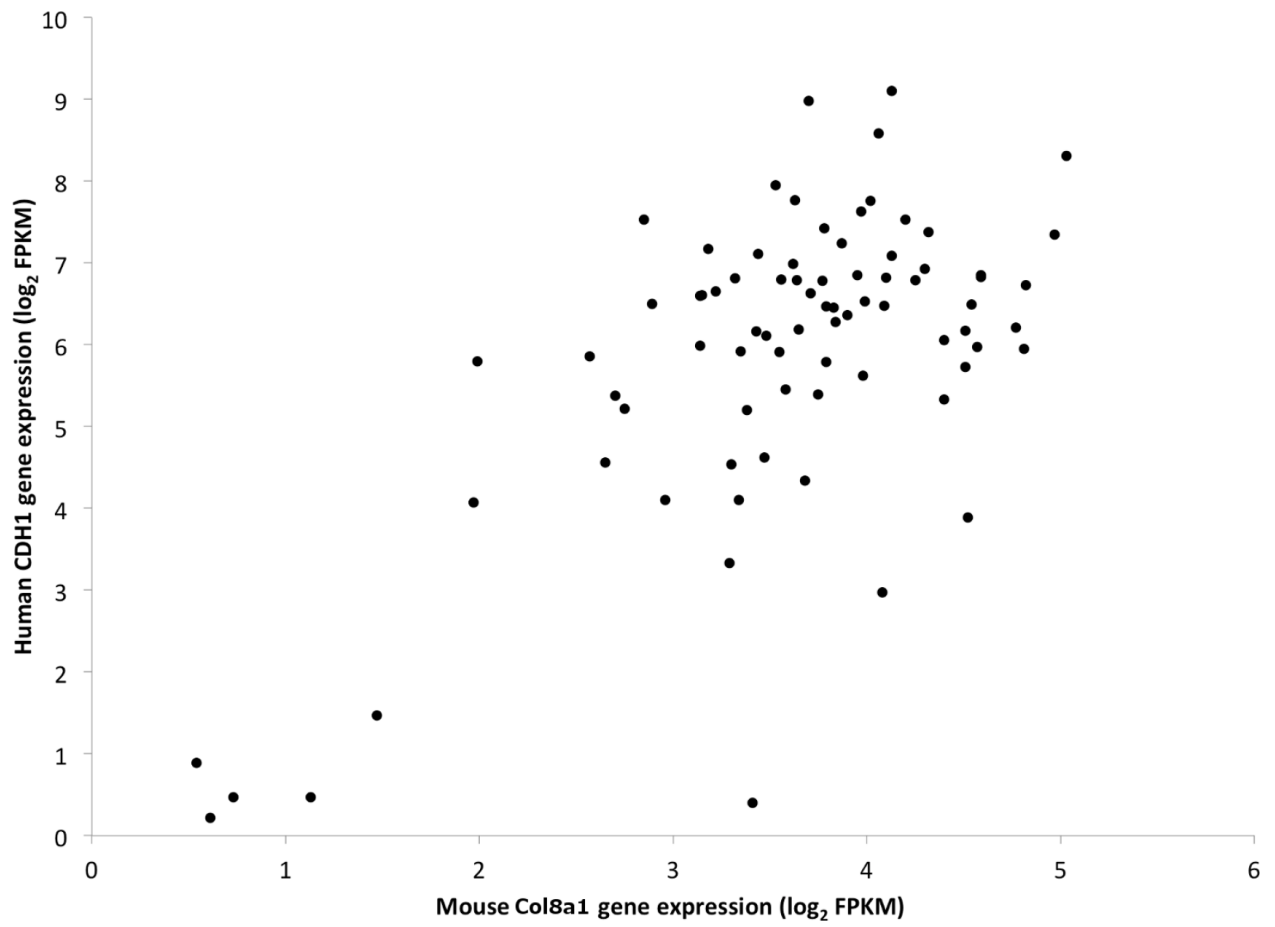

Supplementary Figure S7: Comparison between human *CDH1* and mouse *Col8a1* gene expression ( $r = 0.67$ ).

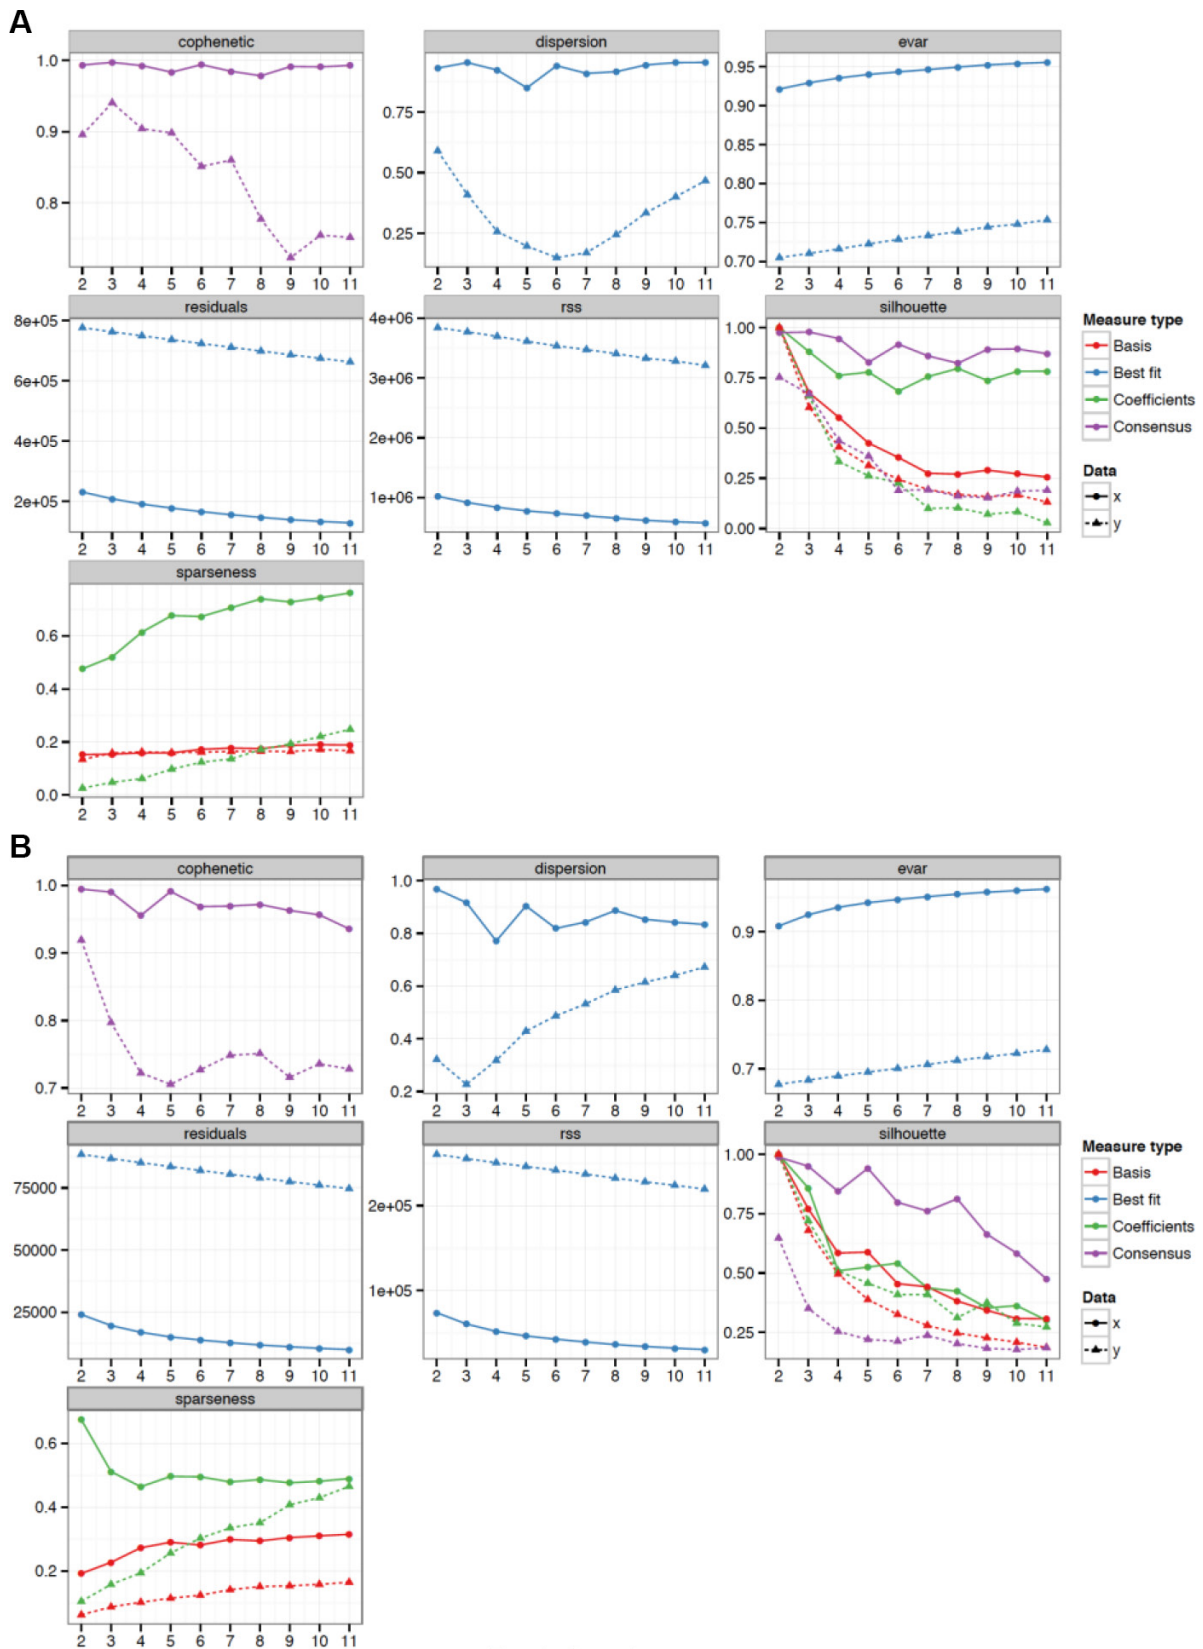

**Supplementary Figure S8: Rank quality measures generated by the R package *NMF* [51].** Quality measures computed from 50 runs for each value of rank  $k$  across (A) human and (B) mouse expression datasets.

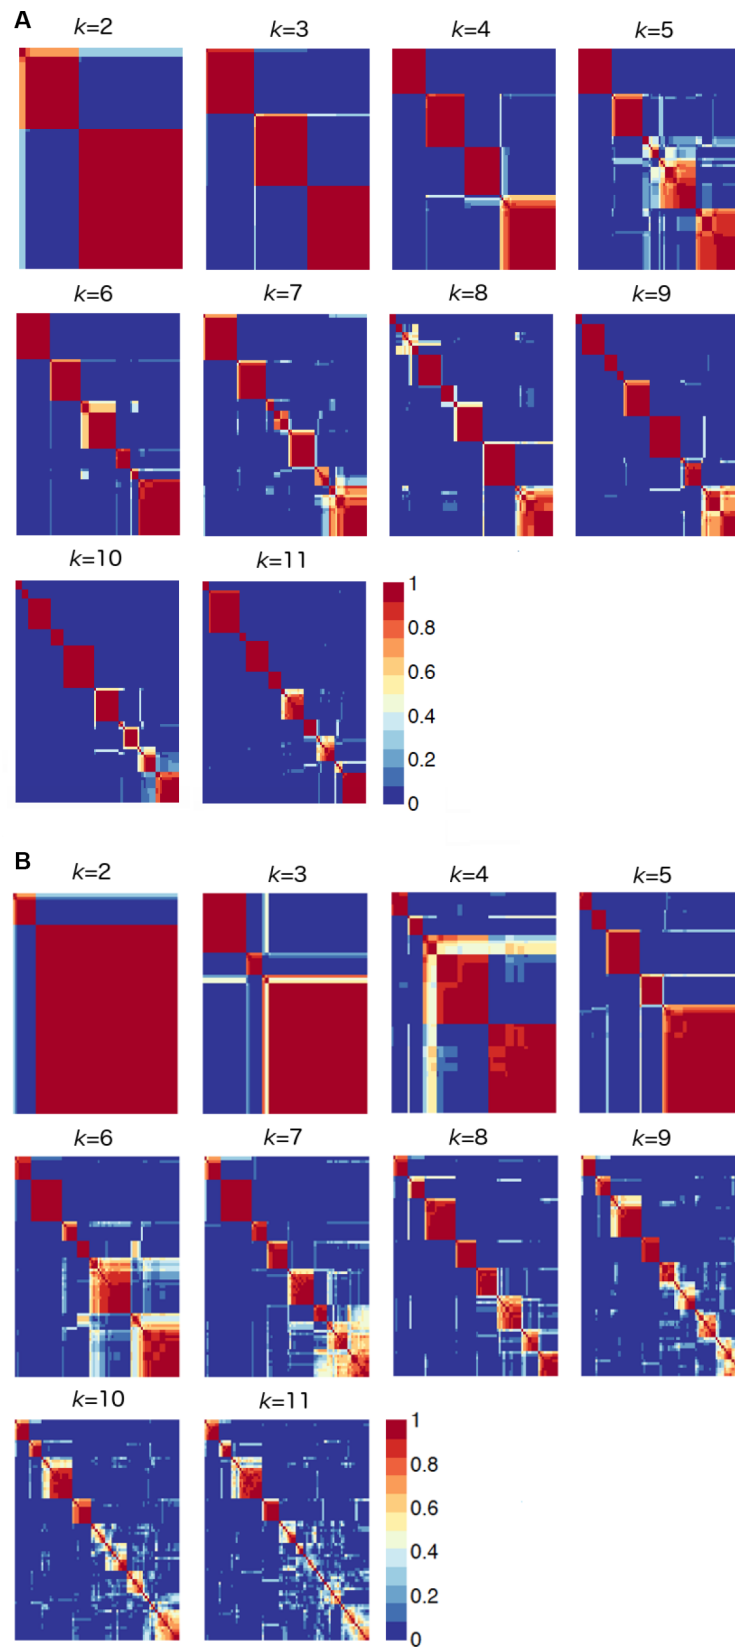

**Supplementary Figure S9: Rank consensus matrices generated by the R package *NMF* [51]. Consensus matrices computed from 50 runs for each value of rank  $k$  across (A) human and (B) mouse datasets.**

## Supplementary Table S1: PDX model metadata

## Supplementary Table S2: Read mapping statistics

| Model        | Total Reads | Mapped Reads | % Mapped Reads | % Annotated Reads | Human Reads | Mouse Reads | Mouse Reads | % Human |
|--------------|-------------|--------------|----------------|-------------------|-------------|-------------|-------------|---------|
| BR0555FJP4M8 | 62542739    | 58464484     | 93.5           | 44626127          | 76.3        | 54671744    | 3792740     | 93.5    |
| BR0744F      | 43437389    | 41401028     | 95.3           | 30039740          | 72.6        | 34985536    | 6415492     | 84.5    |
| BR0869F      | 54076262    | 50599968     | 93.6           | 33562118          | 66.3        | 48441190    | 2158778     | 95.7    |
| BR1126F      | 61331401    | 56945968     | 92.8           | 43946540          | 77.2        | 54442131    | 2503837     | 95.6    |
| CN0330F      | 42693376    | 40474796     | 94.8           | 32299372          | 79.8        | 35976942    | 4497854     | 88.9    |
| CN0375F      | 42565436    | 40409136     | 94.9           | 32147764          | 79.6        | 30427086    | 9982050     | 75.3    |
| CN0446F      | 43295778    | 41190206     | 95.1           | 29879372          | 72.5        | 37992068    | 3198138     | 92.2    |
| CN0458F      | 43311392    | 41313132     | 95.4           | 35918603          | 86.9        | 38417607    | 2895525     | 93.0    |
| CN1854F      | 43649301    | 41694281     | 95.5           | 34508067          | 82.8        | 39375433    | 2318848     | 94.4    |
| CRC040       | 42759607    | 40493334     | 94.7           | 34413394          | 85.0        | 35545398    | 4947936     | 87.8    |
| CTC174       | 70702003    | 65880202     | 93.2           | 48319217          | 73.3        | 57737942    | 8142260     | 87.6    |
| CTG0159      | 66421199    | 62924102     | 94.7           | 42872595          | 68.1        | 61187720    | 1736382     | 97.2    |
| CTG0160      | 67582966    | 63975227     | 94.7           | 51266285          | 80.1        | 60668632    | 3306595     | 94.8    |
| CTG0166      | 55633817    | 52699831     | 94.7           | 36569923          | 69.4        | 50542041    | 2157790     | 95.9    |
| CTG0198      | 63317742    | 57856084     | 91.4           | 34199763          | 59.1        | 63397883    | 1363061     | 97.9    |
| CTG0199      | 69601722    | 64760944     | 93.0           | 46288020          | 71.5        | 51978904    | 5877180     | 89.8    |
| EN0346F      | 66131394    | 61449455     | 92.9           | 40022876          | 65.1        | 41524869    | 19924586    | 67.6    |
| EN0419F      | 57137938    | 53810721     | 94.2           | 32503512          | 60.4        | 48790735    | 5019986     | 90.7    |
| EN129774     | 43006866    | 41140673     | 95.7           | 29023291          | 70.5        | 39784481    | 1356192     | 96.7    |
| EPLG7126     | 69555960    | 66043153     | 94.9           | 50012639          | 75.7        | 57102199    | 8940954     | 86.5    |
| EPLG7177     | 56856185    | 54015965     | 95.0           | 38355161          | 71.0        | 51616844    | 2399121     | 95.6    |
| EPLG7198     | 62729961    | 59002212     | 94.1           | 44837184          | 76.0        | 54077967    | 4924245     | 91.7    |
| EPLG7298     | 70550148    | 67193782     | 95.2           | 43555502          | 64.8        | 61272329    | 5921453     | 91.2    |
| EPLG7343     | 63972721    | 60751734     | 95.0           | 45185827          | 74.4        | 57156091    | 3595643     | 94.1    |
| EPLG7406     | 71294499    | 66874289     | 93.8           | 48121426          | 72.0        | 47856823    | 19017466    | 71.6    |
| EPLG7414     | 64003077    | 61000135     | 95.3           | 46530898          | 76.3        | 57370732    | 3629403     | 94.1    |
| EPLG7466     | 58368323    | 55317110     | 94.8           | 46207143          | 83.5        | 51022810    | 4294300     | 92.2    |
| EPLG7506     | 71973670    | 68211555     | 94.8           | 48336173          | 70.9        | 64518879    | 3692676     | 94.6    |
| EPLG7700     | 59773620    | 56520609     | 94.6           | 44549140          | 78.8        | 47550205    | 8970404     | 84.1    |
| EPLG7747     | 66418350    | 62635401     | 94.3           | 47551697          | 75.9        | 56587754    | 6047647     | 90.3    |
| EPLG7766     | 62323687    | 58691417     | 94.2           | 46503433          | 79.2        | 52494193    | 6197224     | 89.4    |
| EPLG7860     | 63550986    | 59964219     | 94.4           | 47124290          | 78.6        | 54861080    | 5103139     | 91.5    |
| EPLG7913     | 62835852    | 59386797     | 94.5           | 46027517          | 77.5        | 49696859    | 9689938     | 83.7    |
| HBCX1        | 61661982    | 57669932     | 93.5           | 40282753          | 69.9        | 53907991    | 3761941     | 93.5    |
| HBCX10       | 59022129    | 52998352     | 89.8           | 38985898          | 73.6        | 49376931    | 3621421     | 93.2    |
| HBCX11       | 59929713    | 54798007     | 91.4           | 36897399          | 67.3        | 50558893    | 4239114     | 92.3    |
| HBCX14       | 59522280    | 55403300     | 93.1           | 38387680          | 69.3        | 52878283    | 2525017     | 95.4    |
| HBCX19       | 66187356    | 60618394     | 91.6           | 38247737          | 63.1        | 47980711    | 12637683    | 79.2    |
| HBCX2        | 64751546    | 60508745     | 93.4           | 44608860          | 73.7        | 55833872    | 4674873     | 92.3    |

|            |          |          |      |          |      |          |          |      |
|------------|----------|----------|------|----------|------|----------|----------|------|
| HBCX24     | 66247839 | 61578003 | 93.0 | 45730508 | 74.3 | 56784105 | 4793898  | 92.2 |
| HBCX3      | 70965395 | 66361048 | 93.5 | 50091710 | 75.5 | 59165645 | 7195403  | 89.2 |
| HBCX34     | 64998184 | 60524905 | 93.1 | 38982266 | 64.4 | 58495564 | 2029341  | 96.6 |
| HBCX6      | 68785450 | 64707637 | 94.1 | 47060026 | 72.7 | 62241075 | 2466562  | 96.2 |
| HBCX7      | 61731418 | 57226482 | 92.7 | 40874786 | 71.4 | 42622236 | 14604246 | 74.5 |
| HBCX9      | 65320259 | 59623365 | 91.3 | 36115460 | 60.6 | 55732621 | 3890744  | 93.5 |
| HBXF002    | 43713188 | 41712800 | 95.4 | 30332324 | 72.7 | 37707869 | 4004931  | 90.4 |
| HBXF079    | 58593485 | 54789934 | 93.5 | 35291685 | 64.4 | 50254849 | 4535085  | 91.7 |
| HCXF001    | 43679637 | 41481005 | 95.0 | 30412903 | 73.3 | 39649208 | 1831797  | 95.6 |
| HCXF034    | 42844883 | 40877255 | 95.4 | 32894734 | 80.5 | 34223741 | 6653514  | 83.7 |
| HLCXF101   | 43731348 | 41530789 | 95.0 | 30733722 | 74.0 | 31093355 | 10437434 | 74.9 |
| HLXF016    | 65250082 | 61439133 | 94.2 | 46653378 | 75.9 | 54812854 | 6626279  | 89.2 |
| HLXF023    | 58350982 | 52962821 | 90.8 | 35797192 | 67.6 | 31227316 | 21735505 | 59.0 |
| HLXF033    | 59080453 | 55794091 | 94.4 | 43308200 | 77.6 | 48260726 | 7533365  | 86.5 |
| HLXF036    | 60395877 | 56872348 | 94.2 | 36742213 | 64.6 | 51285011 | 5587337  | 90.2 |
| HLXF036LN  | 72040979 | 67314012 | 93.4 | 42110592 | 62.6 | 57416725 | 9897287  | 85.3 |
| HLXF048    | 69567315 | 64904025 | 93.3 | 44431828 | 68.5 | 42358444 | 22545581 | 65.3 |
| HLXF056    | 54956720 | 51111497 | 93.0 | 36539452 | 71.5 | 41631533 | 9479964  | 81.5 |
| HLXF093    | 58292862 | 54048883 | 92.7 | 36382695 | 67.3 | 43963270 | 10085613 | 81.3 |
| HOXF031    | 54699449 | 51946887 | 95.0 | 39540714 | 76.1 | 42906796 | 9040091  | 82.6 |
| HOXF050    | 51882482 | 48814070 | 94.1 | 30314748 | 62.1 | 47449242 | 1364828  | 97.2 |
| HOXF060    | 56409893 | 50999389 | 90.4 | 31920661 | 62.6 | 15385308 | 35614081 | 30.2 |
| HOXF062    | 64384424 | 60487230 | 93.9 | 36137540 | 59.7 | 55871102 | 4616128  | 92.4 |
| HPAXF006   | 43822652 | 41879082 | 95.6 | 34260421 | 81.8 | 36005319 | 5873763  | 86.0 |
| HPAXF014LN | 42787191 | 40960511 | 95.7 | 29613526 | 72.3 | 36247434 | 4713077  | 88.5 |
| HPAXF037   | 43586040 | 41658374 | 95.6 | 34042310 | 81.7 | 35073909 | 6584465  | 84.2 |
| HPAXF049   | 43146686 | 41324116 | 95.8 | 34030187 | 82.3 | 38214263 | 3109853  | 92.5 |
| IC11LC13   | 57678042 | 53710269 | 93.1 | 37181492 | 69.2 | 51546682 | 2163587  | 96.0 |
| IC14LC18   | 64882503 | 60589294 | 93.4 | 41241824 | 68.1 | 47419380 | 13169914 | 78.3 |
| IC1TEP     | 58608031 | 53660221 | 91.6 | 42113157 | 78.5 | 52058488 | 1601733  | 97.0 |
| IC20DAN    | 65961544 | 61567205 | 93.3 | 50187375 | 81.5 | 59315892 | 2251313  | 96.3 |
| IC8LC10    | 59053328 | 55961113 | 94.8 | 43176290 | 77.2 | 50719944 | 5241169  | 90.6 |
| IC9LC11    | 53230774 | 50116881 | 94.2 | 38789998 | 77.4 | 43597342 | 6519539  | 87.0 |
| LG0567F    | 62706991 | 58511950 | 93.3 | 44101668 | 75.4 | 41214402 | 17297548 | 70.4 |
| LG0645F    | 42762441 | 40873755 | 95.6 | 32560894 | 79.7 | 39052823 | 1820932  | 95.5 |
| ML5LC66    | 57615978 | 54379674 | 94.4 | 42985577 | 79.0 | 44743725 | 9635949  | 82.3 |
| OV0529F    | 42529594 | 40845451 | 96.0 | 34106273 | 83.5 | 38188735 | 2656716  | 93.5 |
| OV0857F    | 65559670 | 61061940 | 93.1 | 43465178 | 71.2 | 54241232 | 6820708  | 88.8 |
| OV2022F    | 43483298 | 41638909 | 95.8 | 32296953 | 77.6 | 38534128 | 3104781  | 92.5 |
| SC131      | 70664722 | 66074901 | 93.5 | 51177669 | 77.5 | 58261176 | 7813725  | 88.2 |



**Supplementary Table S3: Estimate scores across human and mouse components**

| Model        | Human         |              |                |               | Mouse         |              |                | Human FAP (log <sub>2</sub> FPKM) | Human CSPG4 (log <sub>2</sub> FPKM) |
|--------------|---------------|--------------|----------------|---------------|---------------|--------------|----------------|-----------------------------------|-------------------------------------|
|              | Stromal Score | Immune Score | Estimate Score | Tumour purity | Stromal Score | Immune Score | Estimate Score |                                   |                                     |
| BR0555FJP4M8 | -3012.51      | -2325.15     | -5337.66       | 0.98          | 1736.61       | 1827.43      | 3564.05        | 0.14                              | 0.77                                |
| BR0744F      | -1753.99      | -1614.69     | -3368.67       | 0.99          | 1275.35       | 2353.23      | 3628.58        | 0.67                              | 0.61                                |
| BR0869F      | -2621.33      | -1760.83     | -4382.16       | 1.00          | 1524.74       | 2004.72      | 3529.46        | 0.21                              | 5.58                                |
| BR1126F      | -3095.05      | -2043.58     | -5138.64       | 0.99          | 1818.82       | 1879.17      | 3697.99        | 0.14                              | 1.54                                |
| CN0330F      | -3234.90      | -1326.99     | -4561.89       | 1.00          | 1835.21       | 1799.77      | 3634.98        | 0.14                              | 0.14                                |
| CN0375F      | -3193.39      | -1517.77     | -4711.16       | 1.00          | 1449.86       | 1451.98      | 2901.84        | 0.14                              | 0.16                                |
| CN0446F      | -2946.76      | -1581.40     | -4528.16       | 1.00          | 1673.52       | 2538.91      | 4212.43        | 4.39                              | 0.45                                |
| CN0458F      | -3142.55      | -1217.75     | -4360.30       | 1.00          | 1726.43       | 1816.31      | 3542.74        | 0.45                              | 0.25                                |
| CN1854F      | -3259.15      | -1292.52     | -4551.67       | 1.00          | 1694.60       | 1763.93      | 3458.53        | 0.94                              | 0.28                                |
| CRC040       | -3282.15      | -1467.75     | -4749.90       | 1.00          | 1250.41       | 1049.63      | 2300.04        | 0.19                              | 0.15                                |
| CTC174       | -3171.40      | -2116.81     | -5288.21       | 0.99          | 1510.44       | 1782.41      | 3292.85        | 0.21                              | 0.33                                |
| CTG0159      | -3172.82      | -777.17      | -3949.99       | 1.00          | 1504.86       | 1580.49      | 3085.36        | 0.79                              | 0.22                                |
| CTG0160      | -3094.28      | -1440.38     | -4534.66       | 1.00          | 1673.21       | 2356.21      | 4029.42        | 0.14                              | 2.04                                |
| CTG0166      | -3169.02      | -2210.23     | -5379.25       | 0.98          | 1977.37       | 1760.46      | 3737.83        | 0.45                              | 0.85                                |
| CTG0198      | -2753.28      | -2672.75     | -5426.02       | 0.98          | 1224.25       | 1574.99      | 2799.24        | 0.67                              | 0.3                                 |
| CTG0199      | -3164.53      | -2345.85     | -5510.38       | 0.98          | 1585.78       | 1682.04      | 3267.82        | 0.14                              | 0.18                                |
| EN0346F      | -2895.52      | -2092.59     | -4988.11       | 0.99          | 1667.95       | 1264.86      | 2932.81        | 0.18                              | 0.17                                |
| EN0419F      | -2852.74      | -1548.92     | -4401.66       | 1.00          | 1774.12       | 1639.28      | 3413.41        | 1.07                              | 0.5                                 |
| EN129774     | -2893.23      | -2082.84     | -4976.08       | 0.99          | 1979.38       | 1800.83      | 3780.21        | 0.14                              | 0.31                                |
| EPLG7126     | -2622.01      | -1556.35     | -4178.36       | 1.00          | 1672.88       | 1770.88      | 3443.76        | 0.14                              | 2.02                                |
| EPLG7177     | -3137.30      | -1651.95     | -4789.25       | 1.00          | 1228.45       | 1214.91      | 2443.36        | 0.14                              | 0.88                                |
| EPLG7198     | -2901.43      | -795.05      | -3696.47       | 1.00          | 1464.81       | 2376.23      | 3841.04        | 5.08                              | 0.53                                |
| EPLG7298     | -3116.25      | -1787.05     | -4903.31       | 0.99          | 1749.25       | 1543.86      | 3293.11        | 0.14                              | 1.7                                 |
| EPLG7343     | -3014.24      | -1617.09     | -4631.33       | 1.00          | 1777.90       | 1808.48      | 3586.38        | 0.14                              | 1.99                                |
| EPLG7406     | -2977.20      | -808.50      | -3785.70       | 1.00          | 1693.40       | 1787.91      | 3481.30        | 0.14                              | 0.18                                |
| EPLG7414     | -3161.05      | -1489.27     | -4650.33       | 1.00          | 1613.31       | 1645.90      | 3259.21        | 0.41                              | 0.67                                |
| EPLG7466     | -2768.49      | -999.87      | -3768.37       | 1.00          | 1851.80       | 2184.00      | 4035.80        | 1.26                              | 3.04                                |
| EPLG7506     | -1885.04      | -1018.08     | -2903.11       | 0.98          | 1650.95       | 2509.98      | 4160.92        | 2.29                              | 3.39                                |
| EPLG7700     | -3200.24      | -930.02      | -4130.26       | 1.00          | 1595.09       | 1795.30      | 3390.39        | 0.96                              | 0.16                                |
| EPLG7747     | -2910.24      | -1370.55     | -4280.79       | 1.00          | 1816.67       | 2018.78      | 3835.45        | 0.14                              | 2.26                                |
| EPLG7766     | -3132.63      | -1385.39     | -4518.02       | 1.00          | 1924.55       | 2575.44      | 4500.00        | 0.14                              | 0.32                                |
| EPLG7860     | -3111.61      | -1276.40     | -4388.01       | 1.00          | 1691.34       | 2114.41      | 3805.75        | 0.41                              | 0.48                                |
| EPLG7913     | -3116.31      | -1089.61     | -4205.92       | 1.00          | 1873.58       | 2156.95      | 4030.53        | 0.95                              | 2.73                                |
| HBCX1        | -2980.83      | -1802.89     | -4783.71       | 1.00          | 1804.46       | 1717.54      | 3522.00        | 0.47                              | 0.97                                |
| HBCX10       | -2811.91      | -1856.38     | -4668.29       | 1.00          | 1807.88       | 2044.15      | 3852.03        | 0.55                              | 2.82                                |

|            |          |          |          |      |         |         |         |      |      |
|------------|----------|----------|----------|------|---------|---------|---------|------|------|
| HBCX11     | -2929.68 | -2082.33 | -5012.01 | 0.99 | 1943.58 | 1737.70 | 3681.28 | 0.33 | 3.47 |
| HBCX14     | -3037.39 | -1420.52 | -4457.91 | 1.00 | 1326.18 | 2517.45 | 3843.64 | 0.22 | 0.31 |
| HBCX19     | -2743.84 | -1851.63 | -4595.48 | 1.00 | 1873.27 | 1400.97 | 3274.24 | 0.89 | 4.85 |
| HBCX2      | -3102.81 | -1991.04 | -5093.85 | 0.99 | 1688.40 | 1937.63 | 3626.03 | 0.26 | 0.19 |
| HBCX24     | -2540.81 | -1266.68 | -3807.48 | 1.00 | 1878.60 | 1736.20 | 3614.80 | 2.1  | 5.77 |
| HBCX3      | -3043.28 | -1593.98 | -4637.26 | 1.00 | 1738.68 | 1996.33 | 3735.00 | 0.63 | 0.62 |
| HBCX34     | -3191.87 | -1920.87 | -5112.74 | 0.99 | 1615.89 | 2111.77 | 3727.66 | 0.23 | 0.52 |
| HBCX6      | -2471.13 | -1503.71 | -3974.83 | 1.00 | 1579.25 | 1757.44 | 3336.69 | 2.08 | 5.79 |
| HBCX7      | -3026.01 | -1023.01 | -4049.03 | 1.00 | 1605.43 | 1467.15 | 3072.58 | 0.14 | 0.56 |
| HBCX9      | -2795.88 | -1149.70 | -3945.57 | 1.00 | 1837.78 | 2090.36 | 3928.14 | 2.91 | 4.2  |
| HBXF002    | -2751.83 | -1300.56 | -4052.39 | 1.00 | 1925.31 | 2272.95 | 4198.26 | 0.19 | 1    |
| HBXF079    | -3061.07 | -1939.72 | -5000.80 | 0.99 | 1657.88 | 1812.07 | 3469.95 | 0.61 | 0.31 |
| HCXF001    | -3063.42 | -2053.22 | -5116.63 | 0.99 | 1937.04 | 1924.55 | 3861.60 | 0.18 | 0.5  |
| HCXF034    | -3352.10 | -1524.09 | -4876.19 | 0.99 | 1980.07 | 1796.24 | 3776.31 | 0.14 | 0.19 |
| HLKXF101   | -1816.05 | 2329.73  | 513.68   | 0.78 | 1698.85 | 2399.41 | 4098.26 | 0.2  | 0.14 |
| HLXF016    | -2954.25 | -1044.06 | -3998.31 | 1.00 | 1556.76 | 2005.14 | 3561.90 | 0.73 | 0.57 |
| HLXF023    | -1883.43 | 2393.99  | 510.56   | 0.78 | 1143.94 | 2446.76 | 3590.69 | 0.18 | 0.15 |
| HLXF033    | -2964.64 | -1494.16 | -4458.80 | 1.00 | 1573.29 | 1781.84 | 3355.13 | 0.49 | 0.23 |
| HLXF036    | -2828.53 | -1429.62 | -4258.15 | 1.00 | 1730.46 | 2312.40 | 4042.85 | 4.81 | 0.47 |
| HLXF036LN  | -2849.29 | -1360.09 | -4209.38 | 1.00 | 1838.12 | 2657.09 | 4495.22 | 4.72 | 0.34 |
| HLXF048    | -1826.06 | 2318.13  | 492.07   | 0.78 | 1501.31 | 2671.34 | 4172.65 | 0.26 | 0.15 |
| HLXF056    | -2841.91 | -1427.30 | -4269.21 | 1.00 | 1836.62 | 2076.67 | 3913.28 | 0.17 | 0.29 |
| HLXF093    | -2812.45 | -94.31   | -2906.76 | 0.98 | 1653.95 | 2204.55 | 3858.50 | 1.79 | 2.06 |
| HOXF031    | -1732.65 | -1888.33 | -3620.99 | 1.00 | 1843.92 | 2128.25 | 3972.17 | 1.44 | 0.95 |
| HOXF050    | -2628.26 | -2358.77 | -4987.03 | 0.99 | 1829.36 | 2305.19 | 4134.55 | 0.72 | 1.66 |
| HOXF060    | -2333.61 | -1609.68 | -3943.28 | 1.00 | 1459.40 | 2325.93 | 3785.33 | 0.14 | 0.2  |
| HOXF062    | -1398.51 | -1450.09 | -2848.60 | 0.98 | 1921.85 | 2099.90 | 4021.75 | 1.91 | 1.42 |
| HPAXF006   | -3105.66 | -1665.23 | -4770.89 | 1.00 | 1892.24 | 1854.91 | 3747.15 | 0.2  | 0.65 |
| HPAXF014LN | -3161.87 | -1337.16 | -4499.03 | 1.00 | 1981.52 | 2234.51 | 4216.03 | 0.42 | 3.17 |
| HPAXF037   | -3036.70 | -1367.99 | -4404.69 | 1.00 | 1748.02 | 1915.19 | 3663.21 | 0.14 | 1.46 |
| HPAXF049   | -3134.56 | -1008.60 | -4143.16 | 1.00 | 1644.54 | 2434.91 | 4079.46 | 0.14 | 0.28 |
| IC11LC13   | -3053.63 | -1650.17 | -4703.80 | 1.00 | 1717.69 | 2240.75 | 3958.44 | 0.25 | 0.45 |
| IC14LC18   | -3047.66 | -793.14  | -3840.80 | 1.00 | 1524.62 | 2359.91 | 3884.54 | 0.25 | 0.2  |
| IC1TEP     | -3210.95 | -1709.15 | -4920.10 | 0.99 | 1647.42 | 1987.35 | 3634.78 | 0.14 | 4.41 |
| IC20DAN    | -2827.91 | -1094.26 | -3922.17 | 1.00 | 1217.22 | 2325.27 | 3542.49 | 1.95 | 5.05 |
| IC8LC10    | -3267.26 | -1375.33 | -4642.59 | 1.00 | 1646.61 | 2050.15 | 3696.76 | 0.18 | 0.3  |
| IC9LC11    | -3271.18 | -1632.86 | -4904.03 | 0.99 | 1699.40 | 1877.71 | 3577.11 | 0.14 | 0.27 |
| LG0567F    | -3207.22 | -655.14  | -3862.36 | 1.00 | 1586.46 | 1475.91 | 3062.37 | 0.23 | 0.2  |
| LG0645F    | -3084.77 | -1130.85 | -4215.62 | 1.00 | 1754.63 | 2340.22 | 4094.85 | 0.76 | 0.42 |
| ML5LC66    | -2786.88 | -679.54  | -3466.43 | 1.00 | 1672.78 | 2038.08 | 3710.86 | 0.79 | 0.32 |
| OV0529F    | -2832.65 | -1208.06 | -4040.72 | 1.00 | 1923.28 | 2110.24 | 4033.52 | 0.25 | 0.25 |

|         |          |          |          |      |         |         |         |      |      |
|---------|----------|----------|----------|------|---------|---------|---------|------|------|
| OV0857F | -1940.07 | -2235.18 | -4175.26 | 1.00 | 1179.14 | 1367.43 | 2546.57 | 0.18 | 2.23 |
| OV2022F | -2464.81 | -2093.62 | -4558.44 | 1.00 | 1914.10 | 2065.22 | 3979.33 | 0.33 | 1.2  |
| SC131   | -3334.63 | -1989.46 | -5324.09 | 0.98 | 1745.87 | 1754.28 | 3500.15 | 0.2  | 0.28 |

**Supplementary Table S4: Human and mouse cluster details**

| Model    | Human (no. of clusters = 9) |          | Mouse (no. of clusters = 5) |          |
|----------|-----------------------------|----------|-----------------------------|----------|
|          | Cluster Number              | Strength | Cluster Number              | Strength |
| EPLG7766 | 1                           | 0.95     | 5                           | 0.15     |
| BR0744F  | 3                           | -0.03    | 5                           | 0.79     |
| CN0446F  | 4                           | 0.93     | 5                           | 0.55     |
| HPAXF049 | 4                           | 0.92     | 5                           | 0.61     |
| HLKXF101 | 5                           | 0.98     | 5                           | 0.60     |
| HLXF048  | 5                           | 0.99     | 5                           | 0.73     |
| HOXF060  | 6                           | 0.76     | 5                           | 0.75     |
| CTG0160  | 1                           | 0.94     | 4                           | 0.19     |
| EPLG7298 | 1                           | 0.91     | 4                           | 0.49     |
| EPLG7343 | 1                           | 0.95     | 4                           | 0.76     |
| EPLG7506 | 1                           | 0.68     | 4                           | 0.37     |
| EPLG7747 | 1                           | 0.95     | 4                           | 0.25     |
| EPLG7860 | 1                           | 0.94     | 4                           | -0.53    |
| EPLG7913 | 1                           | 0.91     | 4                           | 0.56     |
| HLXF093  | 1                           | 0.77     | 4                           | -0.13    |
| IC11LC13 | 1                           | 0.94     | 4                           | -0.45    |
| IC1TEP   | 1                           | 0.94     | 4                           | 0.55     |
| BR0869F  | 2                           | 0.94     | 4                           | 0.60     |
| BR1126F  | 2                           | 0.93     | 4                           | 0.34     |
| HBCX1    | 2                           | 0.96     | 4                           | 0.27     |
| HBCX10   | 2                           | 0.96     | 4                           | 0.63     |
| HBCX11   | 2                           | 0.94     | 4                           | 0.61     |
| HBCX14   | 2                           | 0.95     | 4                           | 0.15     |
| HBCX24   | 2                           | 0.96     | 4                           | 0.47     |
| HBCX6    | 2                           | 0.96     | 4                           | 0.42     |
| HBCX9    | 2                           | 0.96     | 4                           | 0.73     |
| EN0419F  | 6                           | -0.04    | 4                           | 0.30     |
| HOXF050  | 6                           | 0.84     | 4                           | 0.64     |
| HOXF062  | 6                           | 0.84     | 4                           | 0.59     |
| HBCX2    | 7                           | 0.82     | 4                           | 0.74     |
| HBCX34   | 7                           | 0.97     | 4                           | 0.75     |
| HBXF079  | 7                           | 0.96     | 4                           | 0.54     |
| CTG0166  | 8                           | 0.96     | 4                           | 0.52     |
| CTG0198  | 8                           | 0.97     | 4                           | 0.55     |
| CTG0199  | 8                           | 0.98     | 4                           | 0.62     |
| CTG0159  | 9                           | 0.51     | 4                           | 0.66     |
| EPLG7198 | 9                           | 0.56     | 4                           | 0.12     |

|              |   |       |   |       |
|--------------|---|-------|---|-------|
| EPLG7406     | 9 | 0.68  | 4 | 0.15  |
| EPLG7414     | 9 | 0.59  | 4 | 0.49  |
| EPLG7466     | 9 | 0.05  | 4 | 0.70  |
| EPLG7700     | 9 | 0.49  | 4 | -0.28 |
| HBCX7        | 9 | -0.20 | 4 | 0.70  |
| HLXF016      | 9 | 0.05  | 4 | -0.13 |
| HLXF033      | 9 | 0.55  | 4 | 0.66  |
| HLXF036      | 9 | 0.15  | 4 | 0.69  |
| HLXF036LN    | 9 | 0.45  | 4 | 0.26  |
| HLXF056      | 9 | 0.69  | 4 | 0.59  |
| EPLG7126     | 1 | 0.95  | 3 | 0.67  |
| CRC040       | 4 | 0.92  | 3 | 0.73  |
| HLXF023      | 5 | 0.99  | 3 | -0.22 |
| OV0857F      | 6 | 0.85  | 3 | 0.84  |
| CTC174       | 7 | 0.97  | 3 | 0.79  |
| LG0567F      | 9 | 0.59  | 3 | 0.25  |
| HBXF002      | 2 | 0.78  | 2 | 0.93  |
| LG0645F      | 3 | -0.25 | 2 | 0.77  |
| OV0529F      | 3 | 0.51  | 2 | 0.80  |
| CN0330F      | 4 | 0.93  | 2 | 0.90  |
| CN0375F      | 4 | 0.93  | 2 | 0.93  |
| CN0458F      | 4 | 0.93  | 2 | 0.78  |
| CN1854F      | 4 | 0.93  | 2 | 0.94  |
| EN0346F      | 4 | 0.18  | 2 | 0.27  |
| HCXF001      | 4 | 0.56  | 2 | 0.93  |
| HCXF034      | 4 | 0.94  | 2 | 0.92  |
| HPAXF006     | 4 | 0.93  | 2 | 0.93  |
| HPAXF014LN   | 4 | 0.93  | 2 | 0.92  |
| HPAXF037     | 4 | 0.94  | 2 | 0.86  |
| EN129774     | 6 | 0.40  | 2 | 0.94  |
| HOXF031      | 6 | 0.63  | 2 | 0.89  |
| OV2022F      | 6 | 0.80  | 2 | 0.92  |
| EPLG7177     | 1 | 0.86  | 1 | 0.75  |
| IC20DAN      | 1 | 0.93  | 1 | 0.81  |
| IC9LC11      | 1 | 0.93  | 1 | 0.91  |
| HBCX19       | 2 | 0.90  | 1 | 0.74  |
| BR0555FJP4M8 | 7 | 0.95  | 1 | 0.68  |
| HBCX3        | 7 | 0.96  | 1 | 0.77  |
| IC14LC18     | 9 | 0.39  | 1 | 0.84  |
| IC8LC10      | 9 | 0.64  | 1 | 0.91  |
| ML5LC66      | 9 | 0.23  | 1 | 0.88  |
| SC131        | 9 | 0.16  | 1 | 0.91  |

**Supplementary Table S5: (a) Human and (b) mouse cluster metagenes**

**Supplementary Table S6: Mouse cluster functional enrichment (functions achieving significant enrichment at benjamini  $p < 0.01$ )**

**Supplementary Table S7: Gene expression correlation between human CDH1 and mouse genes**

**Supplementary Table S8: Genes with highest number of inter-species connections in human-mouse expression stringent ( $|r| > 0.85$ ) correlation network**

| Gene symbol            | Ensembl ID         | No. of connected nodes |       |
|------------------------|--------------------|------------------------|-------|
|                        |                    | Human                  | Mouse |
| <b>(a) Human genes</b> |                    |                        |       |
| MIF                    | ENSG00000240972    | 58                     | 17    |
| SCAND1                 | ENSG00000171222    | 35                     | 10    |
| AC119673.1             | ENSG00000268313    | 0                      | 6     |
| TMEM160                | ENSG00000130748    | 38                     | 3     |
| POLR2L                 | ENSG00000177700    | 97                     | 2     |
| AC040977.1             | ENSG00000269871    | 4                      | 2     |
| PRR7                   | ENSG00000131188    | 48                     | 1     |
| MZT2B                  | ENSG00000152082    | 46                     | 1     |
| MZT2A                  | ENSG00000173272    | 62                     | 1     |
| TRAPPC5                | ENSG00000181029    | 81                     | 1     |
| <b>(b) Mouse genes</b> |                    |                        |       |
| Ddx6                   | ENSMUSG00000032097 | 8                      | 33    |
| Hnrnpa2b1              | ENSMUSG00000004980 | 3                      | 60    |
| Ddx3x                  | ENSMUSG00000000787 | 2                      | 26    |
| Chmp2b                 | ENSMUSG00000004843 | 2                      | 34    |
| Actr2                  | ENSMUSG00000020152 | 2                      | 43    |
| Tm9sf3                 | ENSMUSG00000025016 | 2                      | 30    |
| Dcun1d5                | ENSMUSG00000032002 | 2                      | 27    |
| Cmtm6                  | ENSMUSG00000032434 | 2                      | 18    |
| Dync1li2               | ENSMUSG00000035770 | 2                      | 22    |
| Fam168b                | ENSMUSG00000037503 | 2                      | 22    |
| Bzw1                   | ENSMUSG00000051223 | 2                      | 41    |
| Hnrnpa3                | ENSMUSG00000059005 | 2                      | 43    |
| Flii                   | ENSMUSG00000002812 | 1                      | 40    |
| Xpo1                   | ENSMUSG00000020290 | 1                      | 42    |
| Tmx1                   | ENSMUSG00000021072 | 1                      | 29    |
| Snrpc                  | ENSMUSG00000024217 | 1                      | 39    |

|        |                    |   |    |
|--------|--------------------|---|----|
| Cct8   | ENSMUSG00000025613 | 1 | 38 |
| Adh5   | ENSMUSG00000028138 | 1 | 16 |
| Strap  | ENSMUSG00000030224 | 1 | 18 |
| Rnf126 | ENSMUSG00000035890 | 1 | 43 |
| Ubald1 | ENSMUSG00000039568 | 1 | 39 |
| Shfm1  | ENSMUSG00000042541 | 1 | 45 |
| Hnrnp2 | ENSMUSG00000045427 | 1 | 33 |
| Scand1 | ENSMUSG00000046229 | 1 | 61 |
| H2afj  | ENSMUSG00000060032 | 1 | 55 |

**Supplementary Table S9: PDX samples (human component) predicted to be hypoxic and normoxic based on human *MIF* and mouse *Ddx6* expression**

| Sample     | Human MIF/mouse Ddx6 expression level | Predicted status |
|------------|---------------------------------------|------------------|
| BR0744F    | Low/High                              | Normoxic         |
| BR0869F    | High/Low                              | Hypoxic          |
| CN0330F    | Low/High                              | Normoxic         |
| CN0375F    | Low/High                              | Normoxic         |
| CN0446F    | Low/High                              | Normoxic         |
| CRC040     | Low/High                              | Normoxic         |
| CTG0159    | High/Low                              | Hypoxic          |
| CTG0198    | High/Low                              | Hypoxic          |
| EN129774   | Low/High                              | Normoxic         |
| EPLG7506   | High/Low                              | Hypoxic          |
| HBCX14     | High/Low                              | Hypoxic          |
| HBCX2      | High/Low                              | Hypoxic          |
| HBCX34     | High/Low                              | Hypoxic          |
| HBXF002    | Low/High                              | Normoxic         |
| HCXF001    | Low/High                              | Normoxic         |
| HCXF034    | Low/High                              | Normoxic         |
| HLKXF101   | Low/High                              | Normoxic         |
| HOXF31     | Low/High                              | Normoxic         |
| HOXF60     | Low/High                              | Normoxic         |
| HPAXF006   | Low/High                              | Normoxic         |
| HPAXF014LN | Low/High                              | Normoxic         |
| HPAXF037   | Low/High                              | Normoxic         |

|          |          |          |
|----------|----------|----------|
| HPAXF049 | Low/High | Normoxic |
| IC1TEP   | High/Low | Hypoxic  |
| IC20DAN  | High/Low | Hypoxic  |
| OV2022F  | Low/High | Normoxic |

**Supplementary Table S10: Mouse genes differentially expressed between basal triple negative and luminal-B ER+ breast cancer PDX samples**

| GENE       | ENSEMBL ID         | Human Gene Name | Mean Expression | Log2 FC | p-value  | FDR     |
|------------|--------------------|-----------------|-----------------|---------|----------|---------|
| Hmga1-rs1  | ENSMUSG00000078249 | NA              | 26.88           | 4.07    | 4.26E-6  | 2.43E-3 |
| Serpib2    | ENSMUSG00000062345 | SERPINB2        | 181.89          | 3.32    | 1.35E-4  | 3.18E-2 |
| Arg1       | ENSMUSG00000019987 | ARG1            | 1222.78         | 3.16    | 6.94E-6  | 3.70E-3 |
| Esm1       | ENSMUSG00000042379 | ESM1            | 187.10          | 2.14    | 3.20E-6  | 2.13E-3 |
| Mmp12      | ENSMUSG00000049723 | MMP12           | 1037.65         | 2.00    | 8.40E-5  | 2.43E-2 |
| Adam8      | ENSMUSG00000025473 | ADAM8           | 1337.67         | 1.87    | 5.75E-5  | 2.09E-2 |
| Nos2       | ENSMUSG00000020826 | NOS2            | 305.04          | 1.82    | 1.69E-6  | 1.50E-3 |
| Igfbp3     | ENSMUSG00000020427 | IGFBP3          | 7506.89         | 1.81    | 3.22E-13 | 1.29E-9 |
| Sh2d5      | ENSMUSG00000045349 | SH2D5           | 146.91          | 1.74    | 4.35E-5  | 1.74E-2 |
| Pgf        | ENSMUSG00000004791 | PGF             | 228.44          | 1.61    | 2.52E-4  | 4.91E-2 |
| Spint2     | ENSMUSG00000074227 | SPINT2          | 68.12           | -1.82   | 1.25E-4  | 3.04E-2 |
| Tril       | ENSMUSG00000043496 | TRIL            | 192.98          | -1.93   | 1.02E-8  | 1.38E-5 |
| St6galnac2 | ENSMUSG00000057286 | ST6GALNAC2      | 98.93           | -2.32   | 3.63E-5  | 1.61E-2 |
| Egflam     | ENSMUSG00000042961 | EGFLAM          | 119.44          | -2.96   | 8.18E-8  | 9.34E-5 |
| Epcam      | ENSMUSG00000045394 | EPCAM           | 4.44            | -3.03   | 1.94E-4  | 4.07E-2 |
| Ltf        | ENSMUSG00000032496 | LTF             | 54.78           | -3.34   | 2.04E-6  | 1.63E-3 |
| Ggt1       | ENSMUSG00000006345 | GGT1            | 17.29           | -3.53   | 5.82E-5  | 2.09E-2 |
| Csn1s1     | ENSMUSG00000070702 | CSN1S1          | 6.02            | -4.49   | 3.09E-6  | 2.13E-3 |

**Supplementary Table S11: List of (a) PDX, (b) UBCS, (c) TCGA and (d) CCLE clinical samples used in basal triple negative breast cancer case study**

**Supplementary Table S12: Genes differentially expressed between triple negative and ER+ breast cancer in clinical stroma (Finak et al. 2008)**

| ProbeName    | GeneName | Genbank ID | log2 FC | p-value  | FDR      |
|--------------|----------|------------|---------|----------|----------|
| A_32_P184464 | ROPN1    | NM_017578  | 4.11    | 3.86E-18 | 1.58E-13 |
| A_23_P340698 | MMP12    | NM_002426  | 2.83    | 4.59E-13 | 3.14E-9  |
| A_23_P4714   | MIA      | NM_006533  | 2.62    | 9.35E-12 | 4.27E-8  |

|              |          |           |       |          |          |
|--------------|----------|-----------|-------|----------|----------|
| A_23_P78248  | KRT23    | NM_173213 | 2.43  | 2.53E-10 | 7.43E-7  |
| A_23_P167159 | SCRG1    | NM_007281 | 2.33  | 3.07E-8  | 5.48E-5  |
| A_24_P114249 | GALNT3   | NM_004482 | 2.05  | 2.46E-4  | 4.39E-2  |
| A_23_P39955  | ACTG2    | NM_001615 | 1.96  | 7.88E-7  | 8.98E-4  |
| A_23_P362694 | C4orf7   | NM_152997 | 1.89  | 1.60E-5  | 7.16E-3  |
| A_23_P91230  | SLPI     | NM_003064 | 1.89  | 1.29E-9  | 3.30E-6  |
| A_23_P348146 | FLJ30046 | NM_144595 | 1.87  | 7.05E-6  | 3.86E-3  |
| A_23_P107911 | KLK10    | NM_002776 | 1.85  | 1.98E-6  | 1.63E-3  |
| A_23_P1691   | MMP1     | NM_002421 | 1.78  | 9.57E-9  | 1.79E-5  |
| A_23_P253123 | VGLL1    | NM_016267 | 1.72  | 1.04E-14 | 1.07E-10 |
| A_24_P297539 | UBE2C    | NM_181803 | 1.69  | 2.88E-5  | 1.08E-2  |
| A_23_P357207 | C6orf117 | NM_138409 | 1.68  | 1.74E-5  | 7.59E-3  |
| A_23_P5301   | TFCP2L1  | NM_014553 | 1.66  | 1.25E-5  | 5.83E-3  |
| A_32_P216520 | WIF1     | NM_007191 | 1.64  | 1.88E-4  | 3.74E-2  |
| A_23_P134176 | SOD2     | NM_000636 | 1.62  | 5.87E-6  | 3.40E-3  |
| A_23_P76249  | KRT6B    | NM_005555 | 1.53  | 1.68E-7  | 2.37E-4  |
| A_23_P214950 | PERP     | NM_022121 | 1.52  | 1.12E-6  | 1.17E-3  |
| A_24_P104407 | DMN      | NM_145728 | 1.51  | 5.50E-6  | 3.24E-3  |
| A_23_P31073  | MYB      | NM_005375 | -1.60 | 9.32E-5  | 2.45E-2  |
| A_24_P347431 | FOXA1    | NM_004496 | -1.60 | 1.17E-9  | 3.20E-6  |
| A_23_P372234 | CA12     | NM_001218 | -1.63 | 4.31E-5  | 1.46E-2  |
| A_23_P50167  | SLC39A6  | NM_012319 | -1.69 | 3.71E-5  | 1.30E-2  |
| A_23_P37127  | FOXA1    | NM_004496 | -1.85 | 2.56E-11 | 1.05E-7  |
| A_23_P393099 | TFF3     | NM_003226 | -2.20 | 7.04E-5  | 2.13E-2  |
| A_23_P113111 | AR       | NM_000044 | -2.35 | 3.73E-6  | 2.60E-3  |
| A_23_P309739 | ESR1     | NM_000125 | -2.46 | 3.86E-6  | 2.64E-3  |

**Supplementary Table S13: (a) Stromal, (b) epithelial-mesenchymal transition (EMT), (c) cancer stem cell (CSC) and (d) reactive stroma signatures used in this study**

| (a) Yoshihara et al. 2013 |          | (b) Loboda et al. 2011 |          | (c) Creighton et al. 2009 |          | (d) Farmer et al. 2008 |
|---------------------------|----------|------------------------|----------|---------------------------|----------|------------------------|
| Stromal                   | Immune   | EMT Up                 | EMT Down | CSC Up                    | CSC Down | Reactive stroma        |
| BTK                       | FGR      | TBXA2R                 | HS3ST1   | CPS1                      | SEMA3F   | DCN                    |
| FMO1                      | ITGAL    | CLDN11                 | TTC22    | VIM                       | BAIAP2L1 | CSPG2                  |
| DCN                       | IL32     | FHL1                   | SYT7     | POU2F2                    | TRAPPC6A | CDH11                  |
| IGF1                      | TRAF3IP3 | VIM                    | ACPP     | TRIO                      | CYB561   | COL3A1                 |
| HGF                       | TYROBP   | DKK3                   | SH3YL1   | ARID1B                    | ANLN     | FAP                    |



|          |          |          |           |          |          |         |
|----------|----------|----------|-----------|----------|----------|---------|
| GPR124   | CD74     | SLC2A3   | CDH1      | FSTL4    | POLA2    | PEDF    |
| MSR1     | TNFRSF1B | EML1     | EPN3      | PSD      | IL20RA   | FBN1    |
| PTGER3   | LCP2     | NAV3     | PRSS8     | HIPK2    | EPN3     | PDGFRL  |
| FCGR2B   | RAB27A   | CYBRD1   | LAMA3     | TRAM2    | NEDD4L   | CTSK    |
| APBB1IP  | ARHGAP15 | FGFR1    | LAMC2     | PDE4A    | KIF1B    | HTRA1   |
| FAP      | IL4R     | EPDR1    | CDH3      | MEF2A    | ERBB3    | ASPEN   |
| ITM2A    | CST7     | MMP2     | ATP2C2    | ATP2B1   | GSTO2    | SPARC   |
| RUNX1T1  | PTPRC    | LEPREL1  | ERBB3     | MAP4K4   | FGFR2    | COL5A2  |
| SP140    | FYB      | TGFB2    | PLA2G10   | ZCCHC6   | ROGDI    | LOXL1   |
| COL5A3   | GMIP     | LGALS1   | DAPP1     | FXYD5    | KIAA1107 | MMP2    |
| NOX4     | RGS1     | TTC28    | MBNL3     | PLEKHG2  | NFATC3   | SPON1   |
| ARHGAP28 | LYZ      | SRPX     | GRHL2     | PTGS1    | MCM2     | SFRP4   |
| SIGLEC1  | NCF4     | TRPA1    | CEACAM6   | NUP188   | MAP3K13  | ITGBL1  |
| HEPH     | IL2RB    | SYDE1    | TMPRSS11E | FKBP5    | NTN4     | CALD1   |
| CD200    | GZMH     | CLIP3    | SLC6A14   | TNRC6B   | TPD52    | COPZ2   |
| MXRA5    | GZMB     | DFNA5    | FXYD3     | KPNA3    | EDN1     | MFAP2   |
| ZNF423   | NFKBIA   | SERPINE1 | BLNK      | DNM1     | MAGI3    | ANGPTL2 |
| FOXF1    | RASSF2   | CCL2     | DSP       | HPS1     | SERTAD4  | PLAU    |
| ATP8B4   | HCK      | PMP22    | WFDC2     | ZBTB16   | ULK2     | COL1A2  |
| WISP1    | SAMHD1   | WNT5B    | LIPG      | SOX6     | GRHL2    | LRRC17  |
| CD33     | CORO1A   | COL12A1  | FA2H      | SH2B3    | KIF9     | C1QTNF3 |
| COMP     | CD37     | RBM24    | TOX3      | QKI      | BIRC5    | SNAI2   |
| TFEC     | LILRB1   | CAP2     | TMC5      | GGCX     | KIF4A    | PCOLCE  |
| WNT2     | TGFB1    | BVES     | MYH14     | ST3GAL5  | EPB41L4B | POSTN   |
| SFRP4    | NKG7     | LAMA4    | CEACAM5   | ARHGEF2  | CRISP3   | ECM2    |
| RARRES2  | LPXN     | LOX      | INPP4B    | TMED5    | TSPAN15  | FBLN1   |
| ASPEN    | IL10RA   | SPARC    | SCNN1A    | CNR1     | RASSF7   | ADAM12  |
| ECM2     | TCIRG1   | DPYSL3   | ARHGDIB   | KLF12    | PLCB4    | MMP11   |
| CXCL12   | CD69     | GNB4     | ITGB6     | CCND2    | PIN4     | AEBP1   |
| MS4A6A   | CLEC2B   | ADAM23   | GALNT3    | CCDC92   | TRPS1    | PDGFRB  |
| MS4A4A   | SELPLG   | EPB41L5  | TSPAN1    | ZMYM2    | MCM4     | GAS1    |
| LY86     | BIN2     | WIPF1    | IRF6      | SLC25A16 | TJP3     | COL6A3  |
| PCDH12   | SH2B3    | NID1     | PPL       | CD97     | ZNF85    | RARRES2 |
| PDGFRB   | ARHGDIB  | PLAGL1   | BSPRY     | IRF5     | TSPAN12  | COL6A1  |
| CD86     | CLEC4A   | CTGF     | GJB6      | PTPRA    | COBL     | TGFB3   |
| IL18R1   | KLRB1    | RECK     | SLPI      | BTG1     | AGR2     | NDN     |
| RGS4     | VNN2     | SRGN     | SH2D3A    | DDB2     | ELAVL2   | C1R     |
| FASLG    | GZMK     | BICC1    | OVOL2     | DTX1     | SHB      | LRP1    |
| TNFSF4   | ITK      | IL13RA2  | STEAP4    | NT5E     | GATA3    | COL10A1 |
| LPPR4    | ZAP70    | PTGIS    | AP1M2     | BIN1     | SLC9A3R1 | DPYSL3  |
| TCF21    | ITGA4    | EVI2A    | KLK10     | ARHGAP24 | INPP4B   | OLFML2B |
| TNN      | GNLY     | ARMCX1   | KLK8      | FRAS1    | CCDC34   | MMP14   |
| KCNJ8    | IL18RAP  | TNFRSF19 | RAB25     | PPP3CA   | FBXO3    | DACT1   |
| RAMP3    | WIPF1    | GNG11    | ALDH3B2   | TCHP     | EXPH5    | MGC3047 |
| ITIH5    | PLEK     | CPA4     | SPINK5    | DYM      | PPM1H    | THBS2   |
| COL10A1  | NCF2     | CHN1     | TTC9      | IFNAR1   | FRK      |         |

|          |          |          |          |           |          |  |
|----------|----------|----------|----------|-----------|----------|--|
| PTGIS    | CD2      | ATP8B3   | VTCN1    | EMP3      | GCNT2    |  |
| F13A1    | CD48     | COL5A1   | GRHL1    | RERE      | CAP2     |  |
| IL1B     | GBP1     | AKAP12   | HOOK1    | SH3BGRL3  | PRLR     |  |
| CD93     | TNFAIP3  | RFTN1    | DSC2     | SSBP2     | WWC1     |  |
| KDR      | MFSD1    | GFPT2    | EHF      | SH3KBP1   | STC2     |  |
| ISLR     | ADCY7    | MAP1B    | ELF5     | CHST7     | AMOTL2   |  |
| AOC3     | CSTA     | POPDC3   | MAP7     | ARID5B    | HES1     |  |
| RSAD2    | SRGN     | POSTN    | SCEL     | BICD1     | C3orf52  |  |
| PLXNC1   | NCKAP1L  | DOCK10   | LCP1     | ST3GAL2   | CISH     |  |
| ENPP2    | PTGER2   | ANGPTL2  | RAPGEF5  | FMNL2     | PLCH1    |  |
| TLR2     | CCR7     | TTL7     | IL1RN    | ABR       | EPB41L5  |  |
| LRRC32   | FGL2     | AOX1     | FGFBP1   | GATS      | CENPA    |  |
| SULF1    | TPST2    | FGF5     | TMPRSS4  | CYGB      | GRB14    |  |
| CH25H    | RAC2     | FGF2     | TRIM29   | ANTXR2    | KIAA1324 |  |
| CILP     | ARHGEF6  | GLIPR1   | POU2F3   | SMPD1     | SSX2IP   |  |
| CXCL9    | LSP1     | CMTM3    | TMPRSS13 | NDST2     | PIK3R3   |  |
| ENPEP    | GMFG     | CDH11    | PAK6     | CTNNB1    | IRF6     |  |
| LUM      | LILRB2   | COL6A1   | GPR87    | DDIT4     | NEK2     |  |
| HDC      | PTPRE    | EMP3     | RASGEF1B | LUZP1     | CENPF    |  |
| IGSF6    | ALOX5AP  | SLC47A1  | ERP27    | KLF13     | WDR34    |  |
| PIK3R5   | GIMAP6   | ATP8B2   | GCNT3    | NFRKB     | BSPRY    |  |
| CXCL14   | GIMAP4   | AFF3     | MARVELD3 | CHST11    | LRP11    |  |
| ADAM12   | DOCK2    | RBMS3    | CNKSRI   | EIF1      | KIAA1217 |  |
| SERPING1 | MICAL1   | TMEM47   | PVRL4    | CHST2     | PLS1     |  |
| MMP3     | AOAH     | ZEB1     | CGN      | BASP1     | IFT81    |  |
| EDNRA    | HLA-F    | ANKRD1   | ANXA9    | FLII      | WWP1     |  |
| SPON1    | CASP1    | LIX1L    | S100A8   | PDE4DIP   | LPGAT1   |  |
| RASGRP3  | CD27     | DAB2     | ILDR1    | PER1      | PARD6B   |  |
| ABCA6    | GPR65    | HS3ST3A1 | FGD2     | POLR2A    | CSE1L    |  |
| ADAMTS5  | PSTPIP1  | AK5      | MAL2     | MAML2     | SPDEF    |  |
| SAMSN1   | BCL2A1   | UCHL1    | FAM83A   | EIF4ENIF1 | OVOL2    |  |
| VSIG4    | IRF8     | ADAMTS1  | LCN2     | SMYD3     | PODXL    |  |
| ERG      | VAV1     | NRG1     | C11orf52 | ZNF335    | MTX2     |  |
| SPON2    | EMP3     | ST3GAL2  | ST14     | APOBEC3G  | MYO5C    |  |
| COX7A1   | MYO1F    | MRAS     | MPP7     | MYCBP2    | THAP10   |  |
| PLXDC1   | CD53     | NEXN     | ANK3     | CACNA1G   | FOXA1    |  |
| ITIH3    | S100A8   | FSTL1    | TMEM45B  | GAS7      | TULP4    |  |
| VCAM1    | MSN      | IGFBP7   | ANKRD22  | FYN       | MLLT4    |  |
| DDR2     | IL2RG    | PTX3     | MARVELD2 | SLC11A1   | GINS2    |  |
| OLFML2B  | ADAM8    | EDIL3    | GPR110   |           | TOP2A    |  |
| FRZB     | FLII     | COL1A2   | SORBS2   |           | RHPN2    |  |
| ACTG2    | RABGAP1L | DLC1     | PROM2    |           | RAB25    |  |
| COL6A3   | LY96     | HTRA1    | MAPK13   |           | MTL5     |  |
| LMOD1    | SLA      | GPR176   | KRTCAP3  |           | INADL    |  |
| TRAT1    | FCER1G   | JAM3     | DMKN     |           | TSPAN2   |  |
| FBLN2    | ITGB2    | FBN1     | CCDC64B  |           | VAV3     |  |

|         |          |          |          |  |          |  |
|---------|----------|----------|----------|--|----------|--|
| CCR1    | CCL5     | TUB      | DENND2D  |  | TMEM106C |  |
| EMCN    | LAPTM5   | C16orf45 | FAM84A   |  | GRHL1    |  |
| EDIL3   | GBP2     | RBPMS2   | SPRR3    |  | DSC2     |  |
| COL1A2  | CTSS     | GREM1    | S100A9   |  | PRRG4    |  |
| GREM1   | S100A9   | TUBA1A   | C1orf106 |  | MAP7     |  |
| COL3A1  | MNDA     | AXL      | ELF3     |  | PKIB     |  |
| ZEB2    | CYBB     | COL3A1   | CDS1     |  | KCNK1    |  |
| LDB2    | TPP1     | ZEB2     | S100P    |  | STX6     |  |
| ITGAM   | CD3D     | ANTXR1   | SYK      |  | BZW2     |  |
| ZFPM2   | LAIR1    | ZFPM2    | RASEF    |  | KCTD3    |  |
| CD14    | CD300A   | CDH2     | FBP1     |  | LRRC1    |  |
| SGCD    | HLA-DPA1 | HAS2     | AQP3     |  | FNBP1L   |  |
| FPR1    | TAP1     | PDE7B    | FAAH2    |  | ARHGAP29 |  |
| COL8A2  | RHOH     | NEGR1    | SPINT1   |  | MNS1     |  |
| C3AR1   | IL7R     | BNC2     | WDR72    |  | SHROOM3  |  |
| LRRC15  | LGALS9   | SUSD5    | MYO5B    |  | LNX2     |  |
| CLEC7A  | RNASE6   | HEG1     | TMC4     |  | MARVELD3 |  |
| C1QB    | CD52     | MSRB3    | SPINT2   |  | TOM1L1   |  |
| C1QA    | PTGER4   | BDNF     | KLK5     |  | ZNF750   |  |
| CD248   | GLRX     | PTRF     | KLK6     |  | PTPRF    |  |
| SCUBE2  | P2RY14   | CDH4     | FAM84B   |  | IGSF3    |  |
| CD163   | RHOG     | F2R      | NPNT     |  | ATP1B1   |  |
| MAF     | HCLS1    | AP1S2    | PTAFR    |  | CGN      |  |
| CDH5    | PRF1     | C1S      | SPRR1B   |  | ENSA     |  |
| BGN     | LCK      | NDN      | SPRR1A   |  | OAZ3     |  |
| CSF1R   | IKZF1    | PAPPA    | HS6ST2   |  | VASH2    |  |
| PAPPA   | EVI2B    | GPC6     | FUT3     |  | CREB3L4  |  |
| OLFML1  | SELL     | FAM101B  | KRT19    |  | NVL      |  |
| SH2D1A  | CCDC69   | LHFP     | AGR3     |  | PKP4     |  |
| PRKG1   | CD247    | KIRREL   | CNTNAP2  |  | EIF2B5   |  |
| THBS2   | MAFB     | PRKD1    | GOLT1A   |  | PLK2     |  |
| PDE2A   | HLA-DMA  | PRR16    | FUT1     |  | CASK     |  |
| COL14A1 | HLA-DRA  | FLRT2    | GRAMD2   |  | MAL2     |  |
| TLR7    | LST1     | NAP1L3   | GPX2     |  | SLC39A4  |  |
| MFAP5   | LTB      | COL4A1   | PRR15    |  | PARD3    |  |
| ITGBL1  | HLA-E    | ZNF788   | MUC20    |  | MAGI1    |  |
| EGFL6   | HLA-G    | FAT4     | STX19    |  | SUV39H2  |  |
| COL15A1 | HLA-B    | NUDT11   | TMEM125  |  | MARVELD2 |  |
| AIF1    | PTPRCAP  | TCF4     | B3GNT3   |  | CNKSR3   |  |
| DIO2    | PVRIG    | ANXA6    | OR2A4    |  | ENAH     |  |
|         | HLA-DPB1 | ELOVL2   | CLDN7    |  | SH3RF1   |  |
|         | IFI30    | SIRPA    | TMEM30B  |  | SORBS2   |  |
|         |          | ALPK2    | C1orf116 |  | USP43    |  |
|         |          | COL5A2   | PKP3     |  | PROM2    |  |
|         |          | DIO2     | FAM110C  |  | KRTCAP3  |  |
|         |          | PNMA2    | KRT5     |  | PPP1R9A  |  |

|  |  |         |          |  |          |  |
|--|--|---------|----------|--|----------|--|
|  |  | TMEM158 | KRT16    |  | F11R     |  |
|  |  |         | CLDN4    |  | TMPRSS3  |  |
|  |  |         | S100A14  |  | RDH13    |  |
|  |  |         | LAMB3    |  | SHANK2   |  |
|  |  |         | MB       |  | NFIA     |  |
|  |  |         | PPP1R14C |  | BPNT1    |  |
|  |  |         | SERPINB5 |  | CAPN13   |  |
|  |  |         | CTAGE4   |  | SLC16A14 |  |
|  |  |         | EPPK1    |  | PDLIM5   |  |
|  |  |         | CKMT1B   |  | ELF3     |  |
|  |  |         | ARHGAP8  |  | CDS1     |  |
|  |  |         | C1orf210 |  | TM4SF18  |  |
|  |  |         | CD24     |  | RPL39L   |  |
|  |  |         |          |  | CDC25A   |  |
|  |  |         |          |  | KIAA0895 |  |
|  |  |         |          |  | PTTG1    |  |
|  |  |         |          |  | CHMP4C   |  |
|  |  |         |          |  | COX6C    |  |
|  |  |         |          |  | RASEF    |  |
|  |  |         |          |  | NKX3-1   |  |
|  |  |         |          |  | SPINT2   |  |
|  |  |         |          |  | TK1      |  |
|  |  |         |          |  | DEGS2    |  |
|  |  |         |          |  | FAM84B   |  |
|  |  |         |          |  | NPNT     |  |
|  |  |         |          |  | EFNA1    |  |
|  |  |         |          |  | B3GALNT1 |  |
|  |  |         |          |  | PGM2     |  |
|  |  |         |          |  | TM4SF1   |  |
|  |  |         |          |  | SMAD1    |  |
|  |  |         |          |  | GPR37    |  |
|  |  |         |          |  | FRMD3    |  |
|  |  |         |          |  | MRPL13   |  |
|  |  |         |          |  | CBX2     |  |
|  |  |         |          |  | CTBP2    |  |
|  |  |         |          |  | ZNF77    |  |
|  |  |         |          |  | C1orf172 |  |
|  |  |         |          |  | IRX5     |  |
|  |  |         |          |  | C8orf4   |  |
|  |  |         |          |  | PPFIA3   |  |
|  |  |         |          |  | PAWR     |  |
|  |  |         |          |  | IRX3     |  |
|  |  |         |          |  | MLF1     |  |
|  |  |         |          |  | TSPYL5   |  |
|  |  |         |          |  | GPR137C  |  |
|  |  |         |          |  | SNRPE    |  |

|  |  |  |  |  |         |  |
|--|--|--|--|--|---------|--|
|  |  |  |  |  | IDH2    |  |
|  |  |  |  |  | TMEM30B |  |
|  |  |  |  |  | EPHB3   |  |
|  |  |  |  |  | ZNF93   |  |
|  |  |  |  |  | CDCA2   |  |
|  |  |  |  |  | JAG2    |  |
|  |  |  |  |  | PBX1    |  |
|  |  |  |  |  | GCNT1   |  |
|  |  |  |  |  | BCAM    |  |
|  |  |  |  |  | HN1     |  |
|  |  |  |  |  | MYO6    |  |
|  |  |  |  |  | SLC22A5 |  |
|  |  |  |  |  | VEPH1   |  |
|  |  |  |  |  | IPP     |  |
|  |  |  |  |  | MB      |  |
|  |  |  |  |  | PAX9    |  |
|  |  |  |  |  | FANK1   |  |
|  |  |  |  |  | TCEA3   |  |
|  |  |  |  |  | CFB     |  |
|  |  |  |  |  | LGR4    |  |
|  |  |  |  |  | PPAPDC2 |  |
|  |  |  |  |  | GTF2H5  |  |

EMT = Epithelial-mesenchymal transition  
CSC = Cancer stem cell.

**Supplementary Table S14: Hyper-geometric *p*-values generated as a result of overlap between cell type signatures and breast cancer case study differentially expressed gene lists**

| Signature                               | BTNBC                    |                                        |              |                                      | ER+ luminal-B           |                                        |                          |                                     |
|-----------------------------------------|--------------------------|----------------------------------------|--------------|--------------------------------------|-------------------------|----------------------------------------|--------------------------|-------------------------------------|
|                                         | PDX (1127 <sup>a</sup> ) | PDX FAP/ CSPG4 low (793 <sup>a</sup> ) | TCGA (1368a) | TCGA low stroma (1763 <sup>a</sup> ) | PDX (511 <sup>a</sup> ) | PDX FAP/ CSPG4 low (569 <sup>a</sup> ) | TCGA (876 <sup>a</sup> ) | TCGA low stroma (847 <sup>a</sup> ) |
| <b>Stromal (137<sup>b</sup>)</b>        | 6.00E-4                  | 3.30E-3                                | 1            | 0.94                                 | 0.94                    | 0.36                                   | 0.88                     | 0.59                                |
| <b>CSC Up (90<sup>c</sup>)</b>          | 1.60E-4                  | 1.59E-3                                | 0.79         | 1.83E-2                              | 0.55                    | 0.4                                    | 0.96                     | 0.96                                |
| <b>CSC Down (211<sup>c</sup>)</b>       | 0.53                     | 0.25                                   | 0.87         | 0.86                                 | 1.26E-3                 | 8.66E-3                                | 1.29E-5                  | 7.65E-7                             |
| <b>EMT Up (144<sup>d</sup>)</b>         | 7.77E-16                 | 4.17E-10                               | 6.63E-2      | 2.05E-7                              | 0.31                    | 5.38E-3                                | 0.39                     | 8.05E-2                             |
| <b>EMT Down (156<sup>d</sup>)</b>       | 1.20E-7                  | 2.68E-6                                | 9.20E-8      | 7.29E-5                              | 6.31E-2                 | 0.32                                   | 4.21E-5                  | 2.54E-5                             |
| <b>Reactive stroma (50<sup>e</sup>)</b> | 6.08E-4                  | 3.04E-3                                | 1.00         | 4.82E-1                              | 1.00                    | 1.00                                   | 0.94                     | 0.94                                |

<sup>a</sup>Number of genes over-expressed in TNBC or ER+ luminal-B.

<sup>b</sup>From Yoshihara et al. 2013.

<sup>c</sup>Breast cancer stem cell (CSC) signature from Creighton et al. 2009.

<sup>d</sup>Epithelial-mesenchymal transition (EMT) signature from Loboda et al. 2011.

<sup>e</sup>From Farmer et al. 2008.
